# Supplementary material for: Evolution of surface deformation related to salt extraction-caused sinkholes in Solotvyno (Ukraine) revealed by Sentinel-1 radar interferometry
Source: Copernicus journal article supplement (doi:10.5194/nhess-2020-84), 2020-04-02
Supplement: Supplementary file 1 [file nhess-2020-84-supplement.pdf]

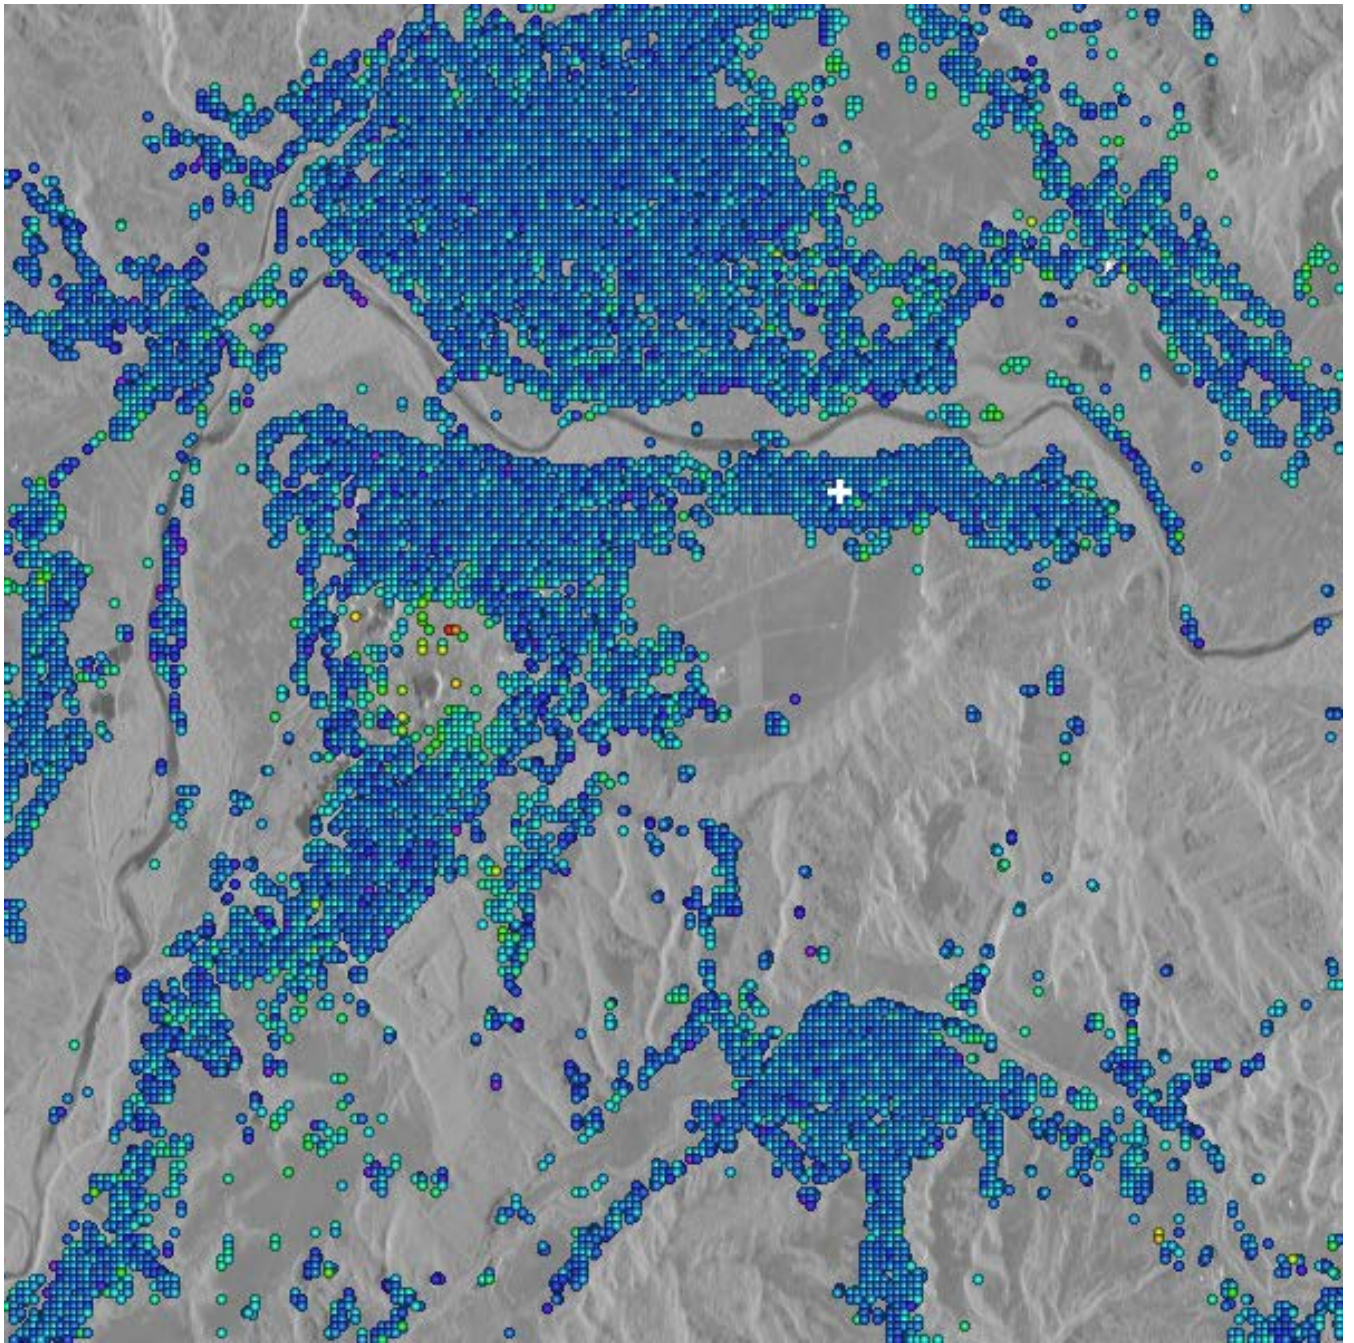

Supp. Fig. 1. LoS linear deformation rate from ascending Sentinel-1 scenes (track 29) in radar geometry, white cross shows non-deforming reference area. Same colorscale as Fig. 6. Contains modified Copernicus Sentinel data [2014-2019]

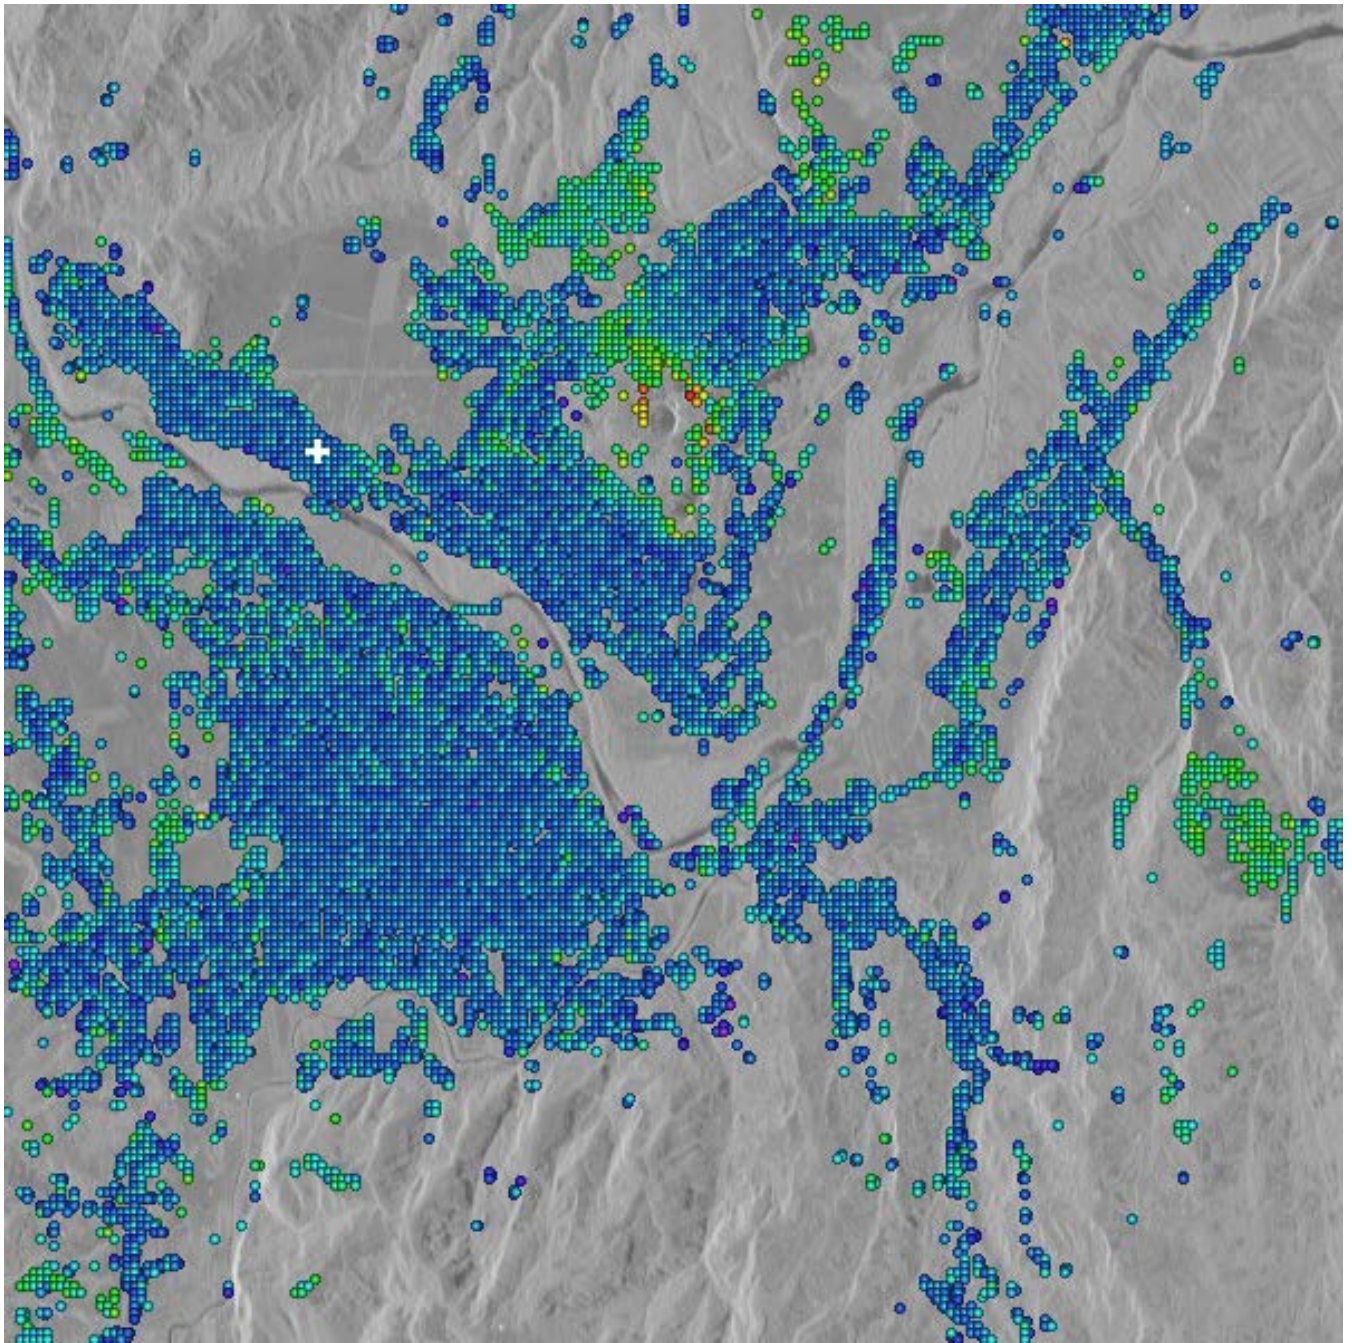

Supp. Fig. 2. LoS linear deformation rate in radar geometry determined from Sentinel-1 data of track 80 (descending pass), white cross shows non-deforming reference area. Same colorscale as Fig. 7. Contains modified Copernicus Sentinel data [2014-2019]
